# Supplementary material
Source: publisher site journal article supplement (https://www.spandidos-publications.com/2578/downloadSupplementary)

Figure S1. Expression of MAPK6 in breast cancer cells. MCF-7 and MDA-MB-231 cells were transfected with pcDNA3.1-MAPK6, pcDNA3.1 plasmid was used as the negative control. (A) Reverse transcription-quantitative PCR was performed to detect the expression of MAPK6 mRNA in MCF-7 and MDA-MB-231 cells after transfection. (B) Western blotting was performed to detect the expression of MAPK6 protein in MCF-7 and MDA-MB-231 cells after transfection. (C) Semi-quantitative analysis of western blot analysis. Experiments were performed in triplicate. \*\* $P < 0.01$  vs. pcDNA3.1. MAPK, mitogen-activated protein kinase 6.

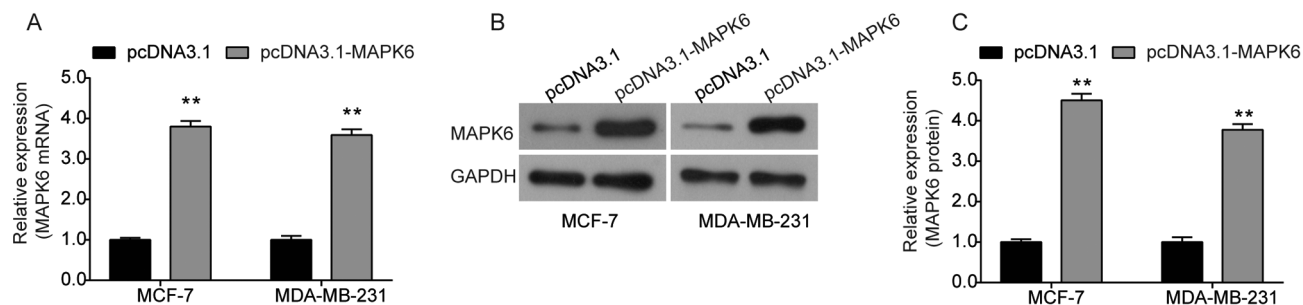

Supplement: Supplementary file 1 [file downloadSupplementary]
